# Supplementary material
Source: publisher site journal article supplement (https://www.dovepress.com/article/337127)
Supplement: Supplementary file 1 [file get_supplementary_file.php]

## Appendix

### Welcome!

This survey was designed in order to investigate how well we manage crisis in our higher education institutions. This is done by using this model for polarity management called PACT.

What are polarities? They are interdependent pairs of values/ solutions that need to be leveraged and managed in order to allow us to achieve what we call the greater purpose.

This survey will ask you to indicate how often you see or experience a number of different behaviors or situations within your organization especially during times of crisis. There are no right or wrong answers -- please read each item carefully and provide your true opinion for each. Here are some guidelines to consider when responding:

- Please answer each demographic question that may appear at the beginning of the assessment. This will help us understand and explore opinions from key stakeholder groups
- Only use the "Sometimes" response in cases where the behavior or situation in question occurs regularly but not frequently
- To help clarify, key terms may be underlined in **BOLD** blue font throughout the survey. Hover your cursor over them to reveal their definitions
- To log out and return later, click the Save & Exit button at the bottom of the page
- When you're done, click the Submit Survey button at the bottom of the page

Thank you again for taking the time to complete this survey! Your feedback is critical in helping us improve our organization.

**WARNING!** You are only previewing this assessment. None of your responses will be saved. This message does not appear on the actual assessment completed by respondents.

### Tell us a little about yourself...

---

#### Type of organization

 

#### What country are you working in?

 

#### What is your role in the organization?

 

## Tell us about your opinions and experience...

| <i>Based on what I see and experience, I'd say...</i>                                                                             | <b>Almost<br/>Never</b> | <b>Seldom</b>         | <b>Sometimes</b>      | <b>Often</b>          | <b>Almost<br/>Always</b> |
|-----------------------------------------------------------------------------------------------------------------------------------|-------------------------|-----------------------|-----------------------|-----------------------|--------------------------|
| Faculty-student communication improves from our attention to immediate needs                                                      | <input type="radio"/>   | <input type="radio"/> | <input type="radio"/> | <input type="radio"/> | <input type="radio"/>    |
| Faculty lose faith in the university capacity to mitigate the crisis                                                              | <input type="radio"/>   | <input type="radio"/> | <input type="radio"/> | <input type="radio"/> | <input type="radio"/>    |
| Faculty become outdated and fail to develop skills necessary for the crisis                                                       | <input type="radio"/>   | <input type="radio"/> | <input type="radio"/> | <input type="radio"/> | <input type="radio"/>    |
| We research systems we will need to support maximum utilization of available resources                                            | <input type="radio"/>   | <input type="radio"/> | <input type="radio"/> | <input type="radio"/> | <input type="radio"/>    |
| We gain a lot of recognition for our institution because of our capacity to adapt and adhere to the requirements of accreditation | <input type="radio"/>   | <input type="radio"/> | <input type="radio"/> | <input type="radio"/> | <input type="radio"/>    |
| Students are trained better on emergent (new) skills and Teaching becomes more targeted and less redundant                        | <input type="radio"/>   | <input type="radio"/> | <input type="radio"/> | <input type="radio"/> | <input type="radio"/>    |
| <i>Based on what I see and experience, I'd say...</i>                                                                             | <b>Almost<br/>Never</b> | <b>Seldom</b>         | <b>Sometimes</b>      | <b>Often</b>          | <b>Almost<br/>Always</b> |
| Faculty feel confident and stable and encouraged to start new projects                                                            | <input type="radio"/>   | <input type="radio"/> | <input type="radio"/> | <input type="radio"/> | <input type="radio"/>    |
| We lose recognition as being socially accountable because we fail to fulfill our role in the community                            | <input type="radio"/>   | <input type="radio"/> | <input type="radio"/> | <input type="radio"/> | <input type="radio"/>    |
| We are no longer the selection of choice for faculty since they identify the university as a non reliable (old ) school           | <input type="radio"/>   | <input type="radio"/> | <input type="radio"/> | <input type="radio"/> | <input type="radio"/>    |
| Our support system fails to maintain vital functions of the institution                                                           | <input type="radio"/>   | <input type="radio"/> | <input type="radio"/> | <input type="radio"/> | <input type="radio"/>    |
| Our graduates end up not equipped with the necessary competencies (eg. clinical skills)                                           | <input type="radio"/>   | <input type="radio"/> | <input type="radio"/> | <input type="radio"/> | <input type="radio"/>    |
| Our teams demonstrate fatigue and exhaustion due to depletion of time and effort in non achieving initiatives                     | <input type="radio"/>   | <input type="radio"/> | <input type="radio"/> | <input type="radio"/> | <input type="radio"/>    |

| <i>Based on what I see and experience, I'd say...</i>                                                                                                                                   | <b>Almost<br/>Never</b> | <b>Seldom</b>         | <b>Sometimes</b>      | <b>Often</b>          | <b>Almost<br/>Always</b> |
|-----------------------------------------------------------------------------------------------------------------------------------------------------------------------------------------|-------------------------|-----------------------|-----------------------|-----------------------|--------------------------|
| <i>Based on what I see and experience, I'd say...</i>                                                                                                                                   | <b>Almost<br/>Never</b> | <b>Seldom</b>         | <b>Sometimes</b>      | <b>Often</b>          | <b>Almost<br/>Always</b> |
| Our teams do not have healthy dynamics based on individual and team frustration, lack of trust and ineffective communication leading to internal conflicts                              | <input type="radio"/>   | <input type="radio"/> | <input type="radio"/> | <input type="radio"/> | <input type="radio"/>    |
| Our international partnerships and relations thrive built upon new avenues of joint problem solving and increase confidence of the community in the capacity of the university to adapt | <input type="radio"/>   | <input type="radio"/> | <input type="radio"/> | <input type="radio"/> | <input type="radio"/>    |
| Our teams demonstrate arrested productivity and loss of direction due to coexistence of parallel teams without clear job descriptions                                                   | <input type="radio"/>   | <input type="radio"/> | <input type="radio"/> | <input type="radio"/> | <input type="radio"/>    |
| We fail to gain the necessary recognition or adhere to requirements of accreditation because our institutions remain in status quo and plans for reform are arrested                    | <input type="radio"/>   | <input type="radio"/> | <input type="radio"/> | <input type="radio"/> | <input type="radio"/>    |
| Students fail to cope with the fast rate of change and lose the opportunity for conventional student life                                                                               | <input type="radio"/>   | <input type="radio"/> | <input type="radio"/> | <input type="radio"/> | <input type="radio"/>    |
| Our students are satisfied with the education process that incorporates their emergent needs                                                                                            | <input type="radio"/>   | <input type="radio"/> | <input type="radio"/> | <input type="radio"/> | <input type="radio"/>    |
| <i>Based on what I see and experience, I'd say...</i>                                                                                                                                   | <b>Almost<br/>Never</b> | <b>Seldom</b>         | <b>Sometimes</b>      | <b>Often</b>          | <b>Almost<br/>Always</b> |
| Lack of clarity makes results in chaotic adhoc decisions and adopting untested educational choices                                                                                      | <input type="radio"/>   | <input type="radio"/> | <input type="radio"/> | <input type="radio"/> | <input type="radio"/>    |
| We increase productivity by saving team resources like time                                                                                                                             | <input type="radio"/>   | <input type="radio"/> | <input type="radio"/> | <input type="radio"/> | <input type="radio"/>    |
| We maintain organizational stability by ensuring modifications needed to attain or maintain accreditation are addressed                                                                 | <input type="radio"/>   | <input type="radio"/> | <input type="radio"/> | <input type="radio"/> | <input type="radio"/>    |

| <i>Based on what I see and experience, I'd say...</i>                                                                                                                                                           | <b>Almost<br/>Never</b> | <b>Seldom</b>         | <b>Sometimes</b>      | <b>Often</b>          | <b>Almost<br/>Always</b> |
|-----------------------------------------------------------------------------------------------------------------------------------------------------------------------------------------------------------------|-------------------------|-----------------------|-----------------------|-----------------------|--------------------------|
| We no longer attract sufficient numbers of international students due to failure to find solutions to problems like travel etc.                                                                                 | <input type="radio"/>   | <input type="radio"/> | <input type="radio"/> | <input type="radio"/> | <input type="radio"/>    |
| Our teams work together in harmony and share experience with other working groups                                                                                                                               | <input type="radio"/>   | <input type="radio"/> | <input type="radio"/> | <input type="radio"/> | <input type="radio"/>    |
| We capture/share ideas about how to improve depth, clarity, and maturity of outcomes to promote future growth                                                                                                   | <input type="radio"/>   | <input type="radio"/> | <input type="radio"/> | <input type="radio"/> | <input type="radio"/>    |
| <i>Based on what I see and experience, I'd say...</i>                                                                                                                                                           | <b>Almost<br/>Never</b> | <b>Seldom</b>         | <b>Sometimes</b>      | <b>Often</b>          | <b>Almost<br/>Always</b> |
| Our teams have healthy dynamics based on individual and team motivation, trust and effective communication                                                                                                      | <input type="radio"/>   | <input type="radio"/> | <input type="radio"/> | <input type="radio"/> | <input type="radio"/>    |
| Our international partnerships and relationships with community fail because we have lost the trust of our stakeholders and gained a reputation for unrealistic approach to problem solving and untimely vision | <input type="radio"/>   | <input type="radio"/> | <input type="radio"/> | <input type="radio"/> | <input type="radio"/>    |
| Students lose faith in the university capacity to mitigate the crisis                                                                                                                                           | <input type="radio"/>   | <input type="radio"/> | <input type="radio"/> | <input type="radio"/> | <input type="radio"/>    |
| We pay attention to future needs that will save time, money, and other resources in an effort to reduce future faculty and student stress                                                                       | <input type="radio"/>   | <input type="radio"/> | <input type="radio"/> | <input type="radio"/> | <input type="radio"/>    |
| Our teams are unique and innovative with a good track record of developing educational methods, educational publications                                                                                        | <input type="radio"/>   | <input type="radio"/> | <input type="radio"/> | <input type="radio"/> | <input type="radio"/>    |
| We capture/share experiences and learning and transfer experience of new methods and evaluation between universities                                                                                            | <input type="radio"/>   | <input type="radio"/> | <input type="radio"/> | <input type="radio"/> | <input type="radio"/>    |
| <i>Based on what I see and experience, I'd say...</i>                                                                                                                                                           | <b>Almost<br/>Never</b> | <b>Seldom</b>         | <b>Sometimes</b>      | <b>Often</b>          | <b>Almost<br/>Always</b> |
| We are the selection of choice for our faculty because of our reputation for being stable and the numbers of admitted students is on the rise                                                                   | <input type="radio"/>   | <input type="radio"/> | <input type="radio"/> | <input type="radio"/> | <input type="radio"/>    |

| <i>Based on what I see and experience, I'd say...</i>                                                                             | <b>Almost<br/>Never</b> | <b>Seldom</b>         | <b>Sometimes</b>      | <b>Often</b>          | <b>Almost<br/>Always</b> |
|-----------------------------------------------------------------------------------------------------------------------------------|-------------------------|-----------------------|-----------------------|-----------------------|--------------------------|
| Our teams lose focus on the target                                                                                                | <input type="radio"/>   | <input type="radio"/> | <input type="radio"/> | <input type="radio"/> | <input type="radio"/>    |
| Responding to immediate crisis results in development of faculty development programs addressing innovations needed in the future | <input type="radio"/>   | <input type="radio"/> | <input type="radio"/> | <input type="radio"/> | <input type="radio"/>    |
| We fail to capture/share experiences that tell how we currently meet our stakeholders' needs                                      | <input type="radio"/>   | <input type="radio"/> | <input type="radio"/> | <input type="radio"/> | <input type="radio"/>    |
| We build relationships and international partnerships with external stakeholders based on trust                                   | <input type="radio"/>   | <input type="radio"/> | <input type="radio"/> | <input type="radio"/> | <input type="radio"/>    |
| Faculty fail to adapt to offered educational alternatives                                                                         | <input type="radio"/>   | <input type="radio"/> | <input type="radio"/> | <input type="radio"/> | <input type="radio"/>    |
| <i>Based on what I see and experience, I'd say...</i>                                                                             | <b>Almost<br/>Never</b> | <b>Seldom</b>         | <b>Sometimes</b>      | <b>Often</b>          | <b>Almost<br/>Always</b> |
| Students fail to adapt to offered educational alternatives                                                                        | <input type="radio"/>   | <input type="radio"/> | <input type="radio"/> | <input type="radio"/> | <input type="radio"/>    |
| We gain a lot of recognition for our institution and we easily adhere to the requirements of accreditation                        | <input type="radio"/>   | <input type="radio"/> | <input type="radio"/> | <input type="radio"/> | <input type="radio"/>    |
| Faculty are trained better on emergent (new) skills and Teaching becomes more targeted and less redundant                         | <input type="radio"/>   | <input type="radio"/> | <input type="radio"/> | <input type="radio"/> | <input type="radio"/>    |
| Our teams struggle to complete assigned tasks due to depletion of team resources                                                  | <input type="radio"/>   | <input type="radio"/> | <input type="radio"/> | <input type="radio"/> | <input type="radio"/>    |
| We experience lack of progress in areas like conventional faculty development                                                     | <input type="radio"/>   | <input type="radio"/> | <input type="radio"/> | <input type="radio"/> | <input type="radio"/>    |
| The clarity of our mission makes decision-making in support of dramatic future growth easy                                        | <input type="radio"/>   | <input type="radio"/> | <input type="radio"/> | <input type="radio"/> | <input type="radio"/>    |
| <i>Based on what I see and experience, I'd say...</i>                                                                             | <b>Almost<br/>Never</b> | <b>Seldom</b>         | <b>Sometimes</b>      | <b>Often</b>          | <b>Almost<br/>Always</b> |
| Our teams demonstrate a competitive attitude due to lack of trust                                                                 | <input type="radio"/>   | <input type="radio"/> | <input type="radio"/> | <input type="radio"/> | <input type="radio"/>    |

| <i>Based on what I see and experience, I'd say...</i>                                                                                                | <b>Almost<br/>Never</b> | <b>Seldom</b>         | <b>Sometimes</b>      | <b>Often</b>          | <b>Almost<br/>Always</b> |
|------------------------------------------------------------------------------------------------------------------------------------------------------|-------------------------|-----------------------|-----------------------|-----------------------|--------------------------|
| Our teams demonstrate unique capabilities like capacity to adopt change and ability to work under pressure                                           | <input type="radio"/>   | <input type="radio"/> | <input type="radio"/> | <input type="radio"/> | <input type="radio"/>    |
| Our graduates are not equipped the desired competencies and skills needed to cope with the crisis                                                    | <input type="radio"/>   | <input type="radio"/> | <input type="radio"/> | <input type="radio"/> | <input type="radio"/>    |
| Our decisions address existing problems                                                                                                              | <input type="radio"/>   | <input type="radio"/> | <input type="radio"/> | <input type="radio"/> | <input type="radio"/>    |
| We lose sight if traditional methods of teaching and assessment to the point that threatens our ability to produce competent graduates in the future | <input type="radio"/>   | <input type="radio"/> | <input type="radio"/> | <input type="radio"/> | <input type="radio"/>    |
| We achieve important objectives such as graduating students on time                                                                                  | <input type="radio"/>   | <input type="radio"/> | <input type="radio"/> | <input type="radio"/> | <input type="radio"/>    |
| <i>Based on what I see and experience, I'd say...</i>                                                                                                | <b>Almost<br/>Never</b> | <b>Seldom</b>         | <b>Sometimes</b>      | <b>Often</b>          | <b>Almost<br/>Always</b> |
| There is a delay in university response to the emergent educational needs of individuals and faculty and student safety is compromised               | <input type="radio"/>   | <input type="radio"/> | <input type="radio"/> | <input type="radio"/> | <input type="radio"/>    |
| Our support system infrastructure (LMS, etc) fails to support our learning curriculum deliverables                                                   | <input type="radio"/>   | <input type="radio"/> | <input type="radio"/> | <input type="radio"/> | <input type="radio"/>    |
| Our teams demonstrate collaboration by sharing of resources, multi-institutional experience, technical experience, personal experience               | <input type="radio"/>   | <input type="radio"/> | <input type="radio"/> | <input type="radio"/> | <input type="radio"/>    |
| Our teams demonstrate lack of motivation and frustration due to unrealistic expectations of higher management                                        | <input type="radio"/>   | <input type="radio"/> | <input type="radio"/> | <input type="radio"/> | <input type="radio"/>    |
| We no longer attract best quality faculty due to failure to find solutions to problems like travel etc.                                              | <input type="radio"/>   | <input type="radio"/> | <input type="radio"/> | <input type="radio"/> | <input type="radio"/>    |
| We are no longer the selection of choice for students since they identify the university as a non reliable (old ) school                             | <input type="radio"/>   | <input type="radio"/> | <input type="radio"/> | <input type="radio"/> | <input type="radio"/>    |

| <i>Based on what I see and experience, I'd say...</i>                                                                                          | <b>Almost<br/>Never</b> | <b>Seldom</b>         | <b>Sometimes</b>      | <b>Often</b>          | <b>Almost<br/>Always</b> |
|------------------------------------------------------------------------------------------------------------------------------------------------|-------------------------|-----------------------|-----------------------|-----------------------|--------------------------|
| <i>Based on what I see and experience, I'd say...</i>                                                                                          | <b>Almost<br/>Never</b> | <b>Seldom</b>         | <b>Sometimes</b>      | <b>Often</b>          | <b>Almost<br/>Always</b> |
| We are the selection of choice for our students because of our reputation for being stable and the numbers of admitted students is on the rise | <input type="radio"/>   | <input type="radio"/> | <input type="radio"/> | <input type="radio"/> | <input type="radio"/>    |
| Our team targets are clear                                                                                                                     | <input type="radio"/>   | <input type="radio"/> | <input type="radio"/> | <input type="radio"/> | <input type="radio"/>    |
| Our graduates expect us to prepare them for future competencies required for success                                                           | <input type="radio"/>   | <input type="radio"/> | <input type="radio"/> | <input type="radio"/> | <input type="radio"/>    |
| We fail to manage existing relationships and international partnerships due to lack of capacity to execute on strategic development goals      | <input type="radio"/>   | <input type="radio"/> | <input type="radio"/> | <input type="radio"/> | <input type="radio"/>    |
| We lose sight of the innovative methods of teaching and assessment that help us to graduate students on time                                   | <input type="radio"/>   | <input type="radio"/> | <input type="radio"/> | <input type="radio"/> | <input type="radio"/>    |
| Faculty become exhausted and start losing their jobs due to inability of the universities to secure them                                       | <input type="radio"/>   | <input type="radio"/> | <input type="radio"/> | <input type="radio"/> | <input type="radio"/>    |
| <i>Based on what I see and experience, I'd say...</i>                                                                                          | <b>Almost<br/>Never</b> | <b>Seldom</b>         | <b>Sometimes</b>      | <b>Often</b>          | <b>Almost<br/>Always</b> |
| The unknown talents and/or potential of faculty and students is seen/appreciated when we address urgent needs together                         | <input type="radio"/>   | <input type="radio"/> | <input type="radio"/> | <input type="radio"/> | <input type="radio"/>    |
| We fail to address the educational problems that are in front of us                                                                            | <input type="radio"/>   | <input type="radio"/> | <input type="radio"/> | <input type="radio"/> | <input type="radio"/>    |
| We fail to capture/ share ideas about how to improve depth, clarity, and maturity of outcomes to promote future growth                         | <input type="radio"/>   | <input type="radio"/> | <input type="radio"/> | <input type="radio"/> | <input type="radio"/>    |
| We waste resources on untested and unidentified needs and risk faculty and student exhaustion due to lack of structure (eg. Technostress)      | <input type="radio"/>   | <input type="radio"/> | <input type="radio"/> | <input type="radio"/> | <input type="radio"/>    |

| <i>Based on what I see and experience, I'd say...</i>                                                                                                  | <b>Almost<br/>Never</b> | <b>Seldom</b>         | <b>Sometimes</b>      | <b>Often</b>          | <b>Almost<br/>Always</b> |
|--------------------------------------------------------------------------------------------------------------------------------------------------------|-------------------------|-----------------------|-----------------------|-----------------------|--------------------------|
| Our faculty appreciate how our strategic orientation contributes to the relaxed learning environment                                                   | <input type="radio"/>   | <input type="radio"/> | <input type="radio"/> | <input type="radio"/> | <input type="radio"/>    |
| We pay immediate attention to save as much time, money, and other resources in an effort to reduce faculty and student stress                          | <input type="radio"/>   | <input type="radio"/> | <input type="radio"/> | <input type="radio"/> | <input type="radio"/>    |
| <i>Based on what I see and experience, I'd say...</i>                                                                                                  | <b>Almost<br/>Never</b> | <b>Seldom</b>         | <b>Sometimes</b>      | <b>Often</b>          | <b>Almost<br/>Always</b> |
| Faculty-student communication improves from anticipating what will be needed to maintain safe, confident, stable and predictable learning environment. | <input type="radio"/>   | <input type="radio"/> | <input type="radio"/> | <input type="radio"/> | <input type="radio"/>    |
| Immediate upgrades to our technology infrastructure (LMS, etc.) supports our learning curriculum                                                       | <input type="radio"/>   | <input type="radio"/> | <input type="radio"/> | <input type="radio"/> | <input type="radio"/>    |
| Our students appreciate how our strategic orientation contributes to the relaxed learning environment                                                  | <input type="radio"/>   | <input type="radio"/> | <input type="radio"/> | <input type="radio"/> | <input type="radio"/>    |
| Our faculty are satisfied with the education process that incorporates their emergent needs                                                            | <input type="radio"/>   | <input type="radio"/> | <input type="radio"/> | <input type="radio"/> | <input type="radio"/>    |
| Our teams and team leaders are perceived as unrealistic in their institutions and cannot deliver as expected                                           | <input type="radio"/>   | <input type="radio"/> | <input type="radio"/> | <input type="radio"/> | <input type="radio"/>    |
| Our teams demonstrate enhanced productivity and integration for crisis mitigation                                                                      | <input type="radio"/>   | <input type="radio"/> | <input type="radio"/> | <input type="radio"/> | <input type="radio"/>    |
